# Supplementary material for: Gleditsia triacanthos Galactomannans in Gluten-Free Formulation: Batter Rheology and Bread Quality
Source: MDPI journal article supplement (doi:10.3390/foods12040756), 2023-02-09
Supplement: s1 [file s1]

## Supplementary Material

### Tables

**Table S1.** Rheological parameters of gluten-free batters.

| Sample             | Storage modulus (Pa) | Loss modulus (Pa) | tan $\delta$  | Complex viscosity (Pa.s) |
|--------------------|----------------------|-------------------|---------------|--------------------------|
| Control            | 5710±183 a           | 1630±70 a         | 0.286±0.005 a | 945±31 a                 |
| Guar 0.5%          | 30,600±3277 b        | 8520±613 b        | 0.279±0.018 a | 5055±526 b               |
| Guar 1.25%         | 619,250±154812 d     | 169,475±42,368 d  | 0.272±0.068 a | 102,150±25,537 d         |
| Guar-Xanthan 0.5%  | 11,5425±17783 c      | 28,675±3712 c     | 0.249±0.008 a | 18,925±2863 c            |
| Guar-Xanthan 1.25% | 661,250±165,312 de   | 189,750±47,437 de | 0.283±0.071 a | 109,425±27,356 de        |

Different letters within a column are significantly different ( $p < 0.05$ ).

**Table S2.** Textural parameters of gluten-free batters.

| Sample             | Unfermented batter |                      | Fermented batter |                      |
|--------------------|--------------------|----------------------|------------------|----------------------|
|                    | Firmness (g)       | Young's modulus (Pa) | Firmness (g)     | Young's modulus (Pa) |
| Control            | 23±4 a             | 2129±694 a           | 21±2 a           | 5923±1692 a          |
| Guar 0.5%          | 50±1 b             | 6883±718 b           | 26±3 ab          | 5768±1859 a          |
| Guar 1.25%         | 138±13 d           | 8839±1228 c          | 30±5 b           | 14,551±880 c         |
| Guar-Xanthan 0.5%  | 95±8 c             | 7542±902 b           | 46±4 c           | 10,474±3022 b        |
| Guar-Xanthan 1.25% | 220±8 e            | 13,149±708 d         | 80±13 d          | 7965±2135 ab         |

Different letters within a column are significantly different ( $p < 0.05$ ).

**Table S3.** Gluten-free bread specific volume and crumb structure.

| Sample             | Cell area (%) | Cell/mm <sup>2</sup> | Cell size (mm) | SBV (cm <sup>3</sup> /g) |
|--------------------|---------------|----------------------|----------------|--------------------------|
| Control            | 48.5±0.3 a    | 0.65±0.02 c          | 0.75±0.02 a    | 1.99±0.30 ab             |
| Guar 0.5%          | 50.6±0.3 c    | 0.47±0.02 b          | 1.08±0.05 bc   | 2.18±0.12 bc             |
| Guar 1.25%         | 50.3±0.2 c    | 0.44±0.02 b          | 1.16±0.05 c    | 2.30±0.28 c              |
| Guar-Xanthan 0.5%  | 50.0±0.2 bc   | 0.31±0.01 a          | 1.58±0.02 d    | 2.13±0.18 abc            |
| Guar-Xanthan 1.25% | 48.8±1.0 ab   | 0.48±0.04 b          | 0.99±0.02 bc   | 1.93±0.16 a              |

Different letters within a column are significantly different ( $p < 0.05$ ).

**Table S4.** Gluten-free bread textural parameters.

| Sample             | Firmness (N) |            |            | Staling rate<br>(N/day) | Chewiness (ad) |            |            |
|--------------------|--------------|------------|------------|-------------------------|----------------|------------|------------|
|                    | Day 0        | Day 1      | Day 3      |                         | Day 0          | Day 1      | Day 3      |
| Control            | 5.6±1.2 d    | 16.1±2.0 d | 42.7±8.9 c | 12.51                   | 6.7±1.3 d      | 14.2±1.5 d | 23.6±5.8 c |
| Guar 0.5%          | 3.7±0.5 b    | 8.1±0.9 b  | 18.0±4.5 b | 4.81                    | 4.3±0.5 b      | 7.5±1.1 b  | 9.5±2.2 b  |
| Guar 1.25%         | 2.7±0.5 a    | 6.2±0.9 a  | 11.6±2.2 a | 2.94                    | 3.1±0.6 a      | 5.9±0.8 a  | 6.0±1.2 a  |
| Guar-Xanthan 0.5%  | 4.1±0.7 bc   | 8.7±1.7 bc | 18.4±3.4 b | 4.78                    | 5.0±0.8 bc     | 8.4±1.8 bc | 11.2±1.9 b |
| Guar-Xanthan 1.25% | 4.8±0.7 c    | 9.5±0.7 c  | 18.7±1.4 b | 4.65                    | 5.8±0.8 c      | 9.4±0.7 c  | 11.9±1.2 b |

Different letters within a column are significantly different ( $p < 0.05$ ).

**Table S5.** Crumb water activity.

| Sample             | $a_w$         |               |                |
|--------------------|---------------|---------------|----------------|
|                    | Day 0         | Day 1         | Day 3          |
| Control            | 0.977±0.001 a | 0.976±0.001 a | 0.967±0.003 a  |
| Guar 0.5%          | 0.979±0.001 a | 0.976±0.001 a | 0.972±0.001 b  |
| Guar 1.25%         | 0.978±0.001 a | 0.977±0.002 a | 0.972±0.002 b  |
| Guar-Xanthan 0.5%  | 0.978±0.001 a | 0.976±0.002 a | 0.970±0.002 ab |
| Guar-Xanthan 1.25% | 0.978±0.001 a | 0.977±0.002 a | 0.972±0.001 b  |

Different letters within a column are significantly different ( $p < 0.05$ ).

**Table S6.** Gluten-free bread crust color.

| Sample             | $L^*$      | $a^*$      | $b^*$       | $\Delta E^*$ |
|--------------------|------------|------------|-------------|--------------|
| Control            | 72.2±4.6 a | 2.5±0.4 c  | 20.3±3.0 bc | -            |
| Guar 0.5%          | 76.1±1.3 b | 3.4±0.7 d  | 25.2±2.1 d  | 6.33         |
| Guar 1.25%         | 80.3±1.0 c | 1.9±0.1 ab | 19.4±1.1 b  | 8.17         |
| Guar-Xanthan 0.5%  | 80.5±0.5 c | 2.4±0.4 bc | 22.5±1.3 c  | 8.59         |
| Guar-Xanthan 1.25% | 80.3±0.9 c | 1.5±0.2 a  | 15.6±1.2 a  | 9.42         |

Different letters within a column are significantly different ( $p < 0.05$ ).

## Figures

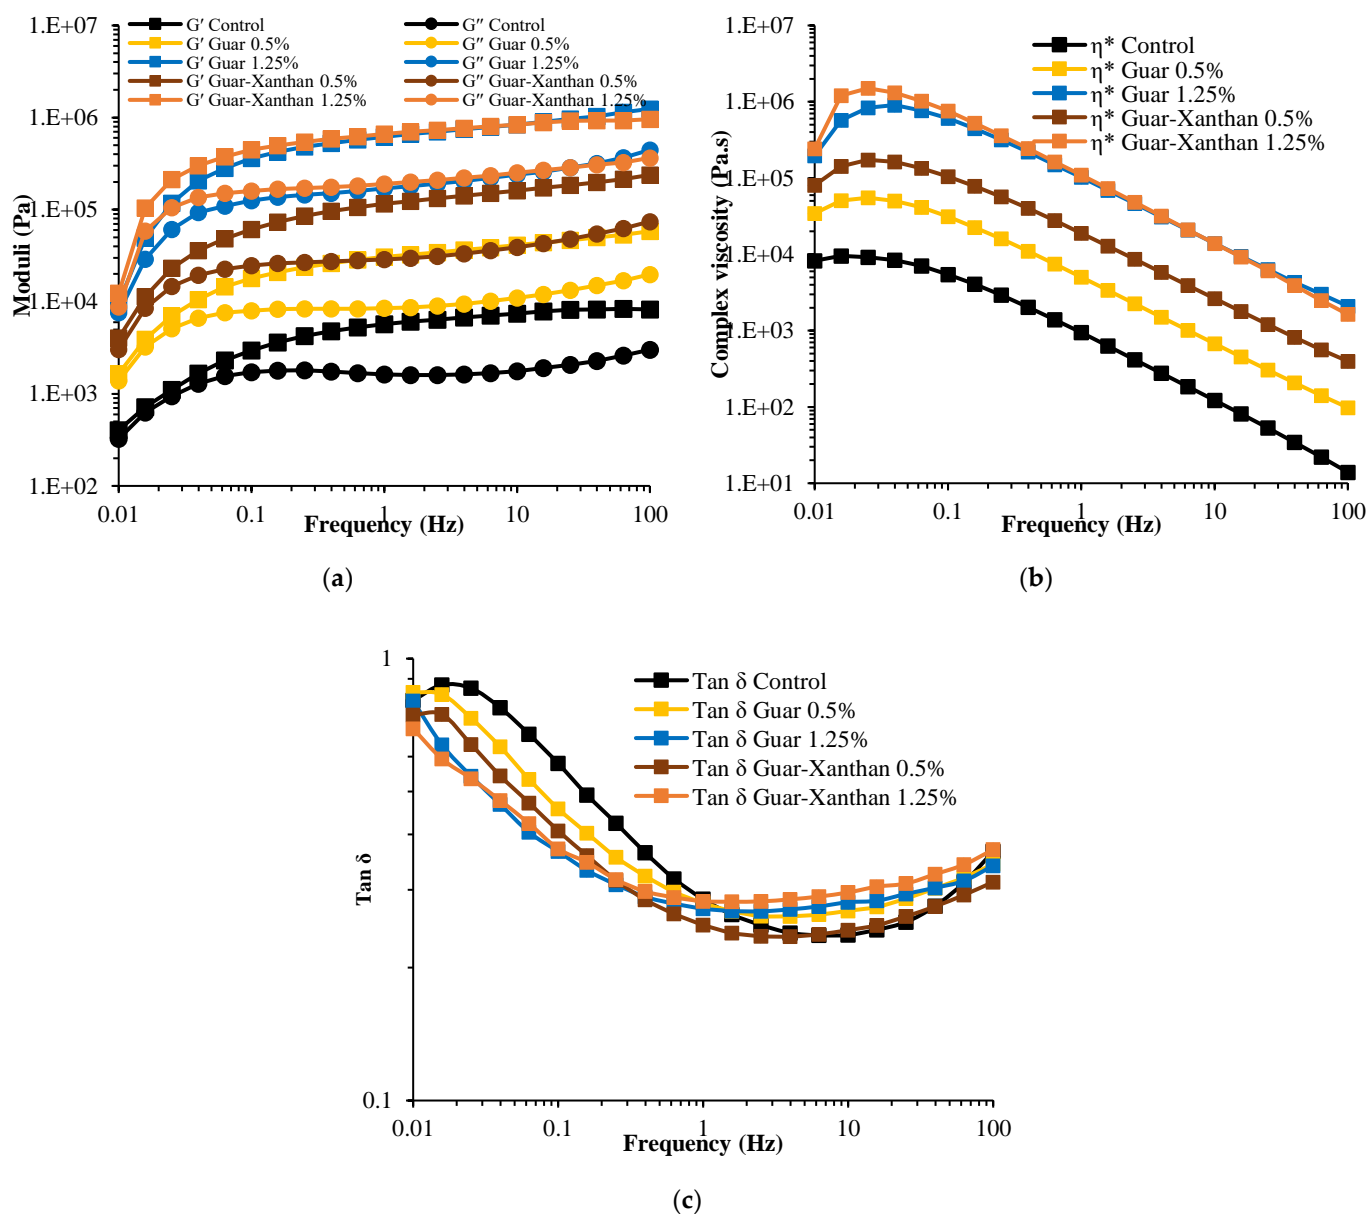

Figure S1. Rheograms for all studied samples. (a) Storage and loss moduli, (b) Complex viscosity, (c)  $\tan \delta$

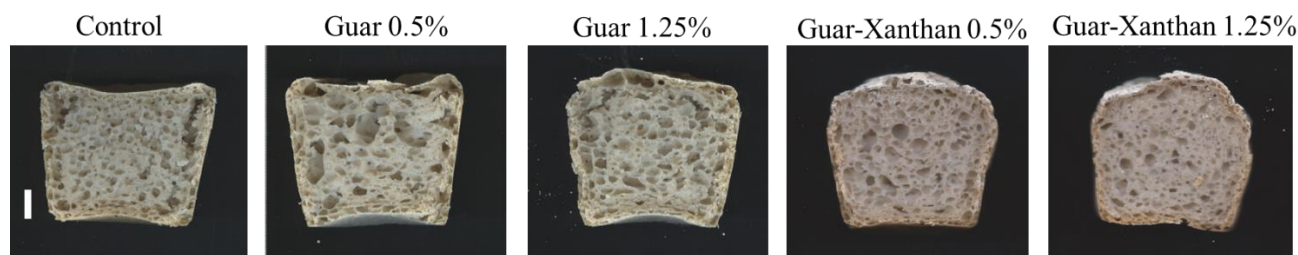

Figure S2. Representative images of gluten-free bread. Bar: 1 cm.
